# Supplementary material for: Inter-pregnancy interval and risk of recurrent pre-eclampsia: systematic review and meta-analysis
Source: PubMed Central journal article supplement (PMC4950816; doi:10.1186/s12978-016-0197-x), 2016-07-18
Supplement: 12978_2016_197_MOESM1_ESM.pdf [file 12978_2016_197_MOESM1_ESM.pdf]

## Estrategias Eclampsia

### PubMed

| Search              | Query                                                                              | Items found           |
|---------------------|------------------------------------------------------------------------------------|-----------------------|
| <a href="#">#25</a> | Search (#12 AND #24)                                                               | <a href="#">611</a>   |
| <a href="#">#24</a> | Search (#13 OR #14 OR #15 OR #16 OR #17 OR #18 OR #19 OR #20 OR #21 OR #22 OR #23) | <a href="#">95629</a> |
| <a href="#">#23</a> | Search Interpregnancy Space*[tiab]                                                 | <a href="#">7</a>     |
| <a href="#">#22</a> | Search Interpregnancy Interval*[tiab]                                              | <a href="#">228</a>   |
| <a href="#">#21</a> | Search Timing[tiab]                                                                | <a href="#">83821</a> |
| <a href="#">#20</a> | Search Subsequent Pregnant*[tiab]                                                  | <a href="#">3263</a>  |
| <a href="#">#19</a> | Search Reproductive Pattern*[tiab]                                                 | <a href="#">413</a>   |
| <a href="#">#18</a> | Search Intergenesic Interval*[tiab]                                                | <a href="#">12</a>    |
| <a href="#">#17</a> | Search Delivery Spac*[tiab]                                                        | <a href="#">5551</a>  |
| <a href="#">#16</a> | Search Delivery Interval*[tiab]                                                    | <a href="#">810</a>   |
| <a href="#">#15</a> | Search Birth Spac*[tiab]                                                           | <a href="#">595</a>   |
| <a href="#">#14</a> | Search Birth Interval*[tiab]                                                       | <a href="#">1007</a>  |
| <a href="#">#13</a> | Search Birth Intervals[Mesh]                                                       | <a href="#">1344</a>  |
| <a href="#">#12</a> | Search (#1 OR #2 OR #3 OR #4 OR #5 OR #6 OR #7 OR #8 OR #9 OR #10 OR #11)          | <a href="#">39116</a> |
| <a href="#">#11</a> | Search Preeclampsia*[tiab]                                                         | <a href="#">12543</a> |
| <a href="#">#10</a> | Search Gestosis[tiab]                                                              | <a href="#">1202</a>  |
| <a href="#">#9</a>  | Search Pregnancy Toxemia*[tiab]                                                    | <a href="#">1239</a>  |
| <a href="#">#8</a>  | Search EPH[tiab]                                                                   | <a href="#">2205</a>  |
| <a href="#">#7</a>  | Search Pre Eclampsia*[tiab]                                                        | <a href="#">7197</a>  |
| <a href="#">#6</a>  | Search Eclampsia*[tiab]                                                            | <a href="#">11032</a> |
| <a href="#">#5</a>  | Search Pregnancy-Induced Hypertension[tiab]                                        | <a href="#">3018</a>  |
| <a href="#">#4</a>  | Search Maternal Hypertens*[tiab]                                                   | <a href="#">518</a>   |
| <a href="#">#3</a>  | Search Gestational Hypertension[tiab]                                              | <a href="#">1435</a>  |
| <a href="#">#2</a>  | Search Transient Hypertension[tiab]                                                | <a href="#">366</a>   |
| <a href="#">#1</a>  | Search Hypertension, Pregnancy-Induced[Mesh]                                       | <a href="#">27494</a> |

### Embase

No. Query Results

Results Date

#25. 12 AND 24

508

|                                              |         |
|----------------------------------------------|---------|
| #24. OR/13-23                                | 133,582 |
| #23. 'interpregnancy space\$':ab,ti          | 0       |
| #22. 'interpregnancy interval\$':ab,ti       | 239     |
| #21. 'timing':ab,ti                          | 99,821  |
| #20. 'subsequent pregnan\$':ab,ti            | 0       |
| #19. 'reproductive pattern\$':ab,ti          | 138     |
| #18. 'intergenesic interval\$':ab,ti         | 11      |
| #17. 'delivery spac\$':ab,ti                 | 0       |
| #16. 'delivery interval\$':ab,ti             | 945     |
| #15. 'birth spac\$':ab,ti                    | 0       |
| #14. 'birth interval\$':ab,ti                | 528     |
| #13. 'family planning'/exp                   | 32,580  |
| #12. OR/1-11                                 | 41,532  |
| #11. 'pregnancy toxemia\$':ab,ti             | 628     |
| #10. 'gestosis':ab,ti                        | 1,456   |
| #9. preeclampsia\$':ab,ti                    | 18,645  |
| #8. eph:ab,ti                                | 2,641   |
| #7. 'pre eclampsia\$':ab,ti                  | 9,393   |
| #6. 'eclampsia\$':ab,ti                      | 14,001  |
| #5. 'pregnancy-induced hypertension\$':ab,ti | 3,788   |
| #4. 'maternal hypertens\$':ab,ti             | 0       |
| #3. 'gestational hypertension':ab,ti         | 2,114   |
| #2. 'transient hypertension':ab,ti           | 416     |
| #1. 'maternal hypertension'/exp              | 10,173  |

| ID  | Search Hits                                                                  |        |
|-----|------------------------------------------------------------------------------|--------|
| #1  | MeSH descriptor: [Hypertension, Pregnancy-Induced] explode all trees         | 713    |
| #2  | Transient Hypertension:ti,ab,kw (Word variations have been searched)         | 542    |
| #3  | Gestational Hypertension:ti,ab,kw (Word variations have been searched)       | 365    |
| #4  | Maternal Hypertens*:ti,ab,kw (Word variations have been searched)            | 412    |
| #5  | Pregnancy-Induced Hypertension:ti,ab,kw (Word variations have been searched) | 318    |
| #6  | Eclampsia*:ti,ab,kw (Word variations have been searched)                     | 918    |
| #7  | Pre Eclampsia*:ti,ab,kw (Word variations have been searched)                 | 815    |
| #8  | EPH:ti,ab,kw (Word variations have been searched)                            | 21     |
| #9  | Pregnancy Toxemia*:ti,ab,kw (Word variations have been searched)             | 31     |
| #10 | Gestosis:ti,ab,kw (Word variations have been searched)                       | 24     |
| #11 | Preeclampsia*:ti,ab,kw (Word variations have been searched)                  | 638    |
| #12 | #1 or #2 or #3 or #4 or #5 or #6 or #7 or #8 or #9 or #10 or #11             | 2284   |
| #13 | MeSH descriptor: [Birth Intervals] explode all trees                         | 12     |
| #14 | Birth Interval*:ti,ab,kw (Word variations have been searched)                | 1635   |
| #15 | Birth Spac*:ti,ab,kw (Word variations have been searched)                    | 68     |
| #16 | Delivery Interval*:ti,ab,kw (Word variations have been searched)             | 2468   |
| #17 | Delivery Spac*:ti,ab,kw (Word variations have been searched)                 | 336    |
| #18 | Intergenesic Interval*:ti,ab,kw (Word variations have been searched)         | 0      |
| #19 | Reproductive Pattern*:ti,ab,kw (Word variations have been searched)          | 76     |
| #20 | Subsequent Pregnan*:ti,ab,kw (Word variations have been searched)            | 804    |
| #21 | Timing:ti,ab,kw (Word variations have been searched)                         | 189095 |
| #22 | Interpregnancy Interval*:ti,ab,kw (Word variations have been searched)       | 3      |
| #23 | Interpregnancy Spac*:ti,ab,kw (Word variations have been searched)           | 0      |
| #24 | #13 or #14 or #15 or #16 or #17 or #18 or #19 or #20 or #21 or #22 or #23    | 191973 |

#25 #12 and #24 607

LILACS

Base de datos : **LILACS**

Búsqueda : **(MH Hipertensión Inducida en el Embarazo OR Transient Hypertension OR Hipertensión Gestacional OR Hipertensão Gestacional OR Gestational Hypertension OR Pregnancy-Induced Hypertension OR Gestosis OR Eclampsia\$ OR Pre Eclampsia\$ OR Pregnancy Toxemia\$ OR Preeclampsia\$) AND (MH Intervalo entre Nacimientos OR Birth Spac\$ OR Birth Interval\$ OR Delivery Interval\$ OR Delivery Spac\$ OR Intergenesic Interval\$ OR Reproductive Pattern\$ OR Subsequent Pregnan\$ OR Espaçamento entre Nascimentos OR Padrão Reprodutivo OR Gravidez Subseqüente OR Patrón Reproductivo OR Timing OR Intervalo Intergenésico OR Interpregnancy Spac\$ OR Interpregnancy Interval\$) [Palabras]**

Referencias encontradas : 2 [[refinar](#)]
